# Supplementary material
Source: PubMed Central journal article supplement (PMC4065805)
Supplement: NIHMS586810-supplement-01.pdf [file NIHMS586810-supplement-01.pdf]

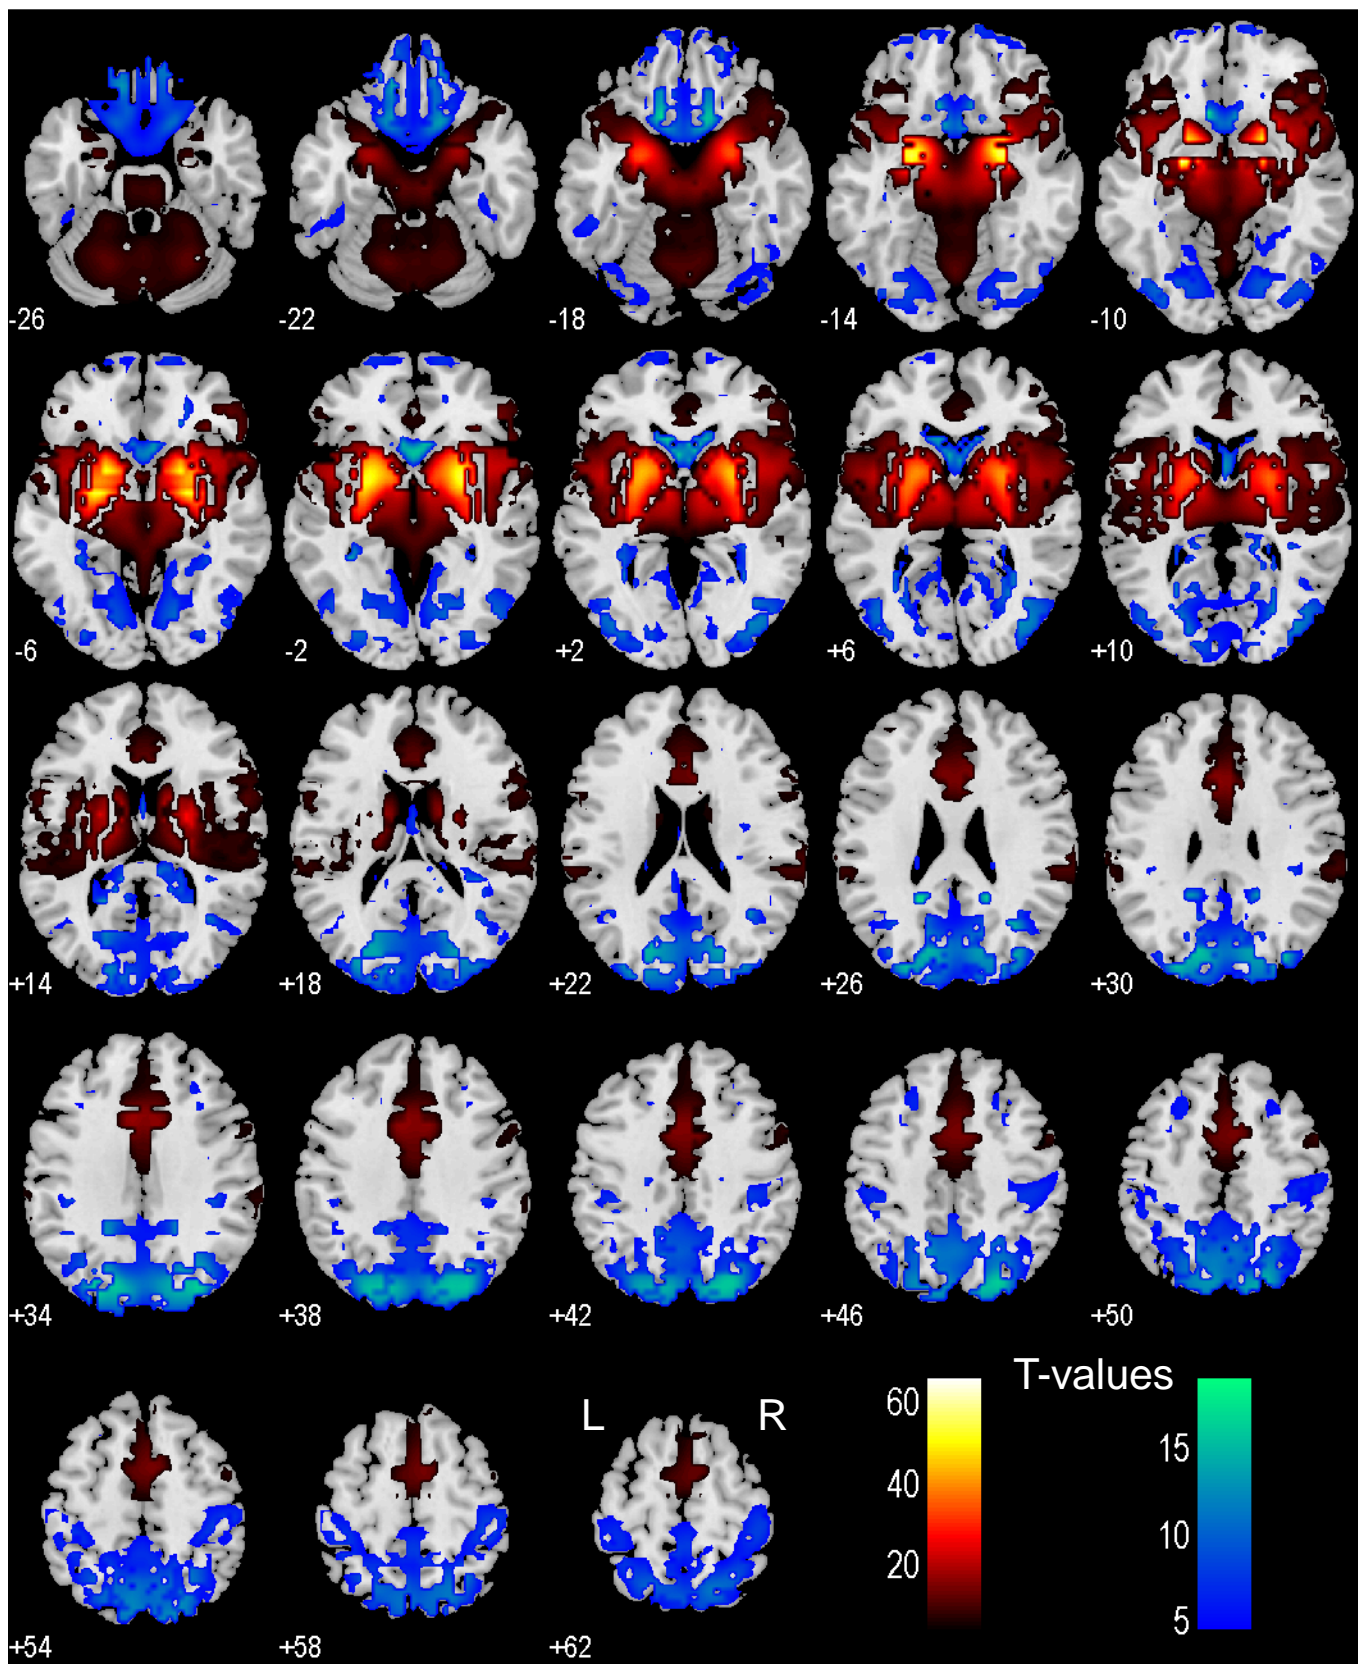

**Supplementary Figure S1: Connectivity of the BNM; time series orthogonalized with respect to VS.**

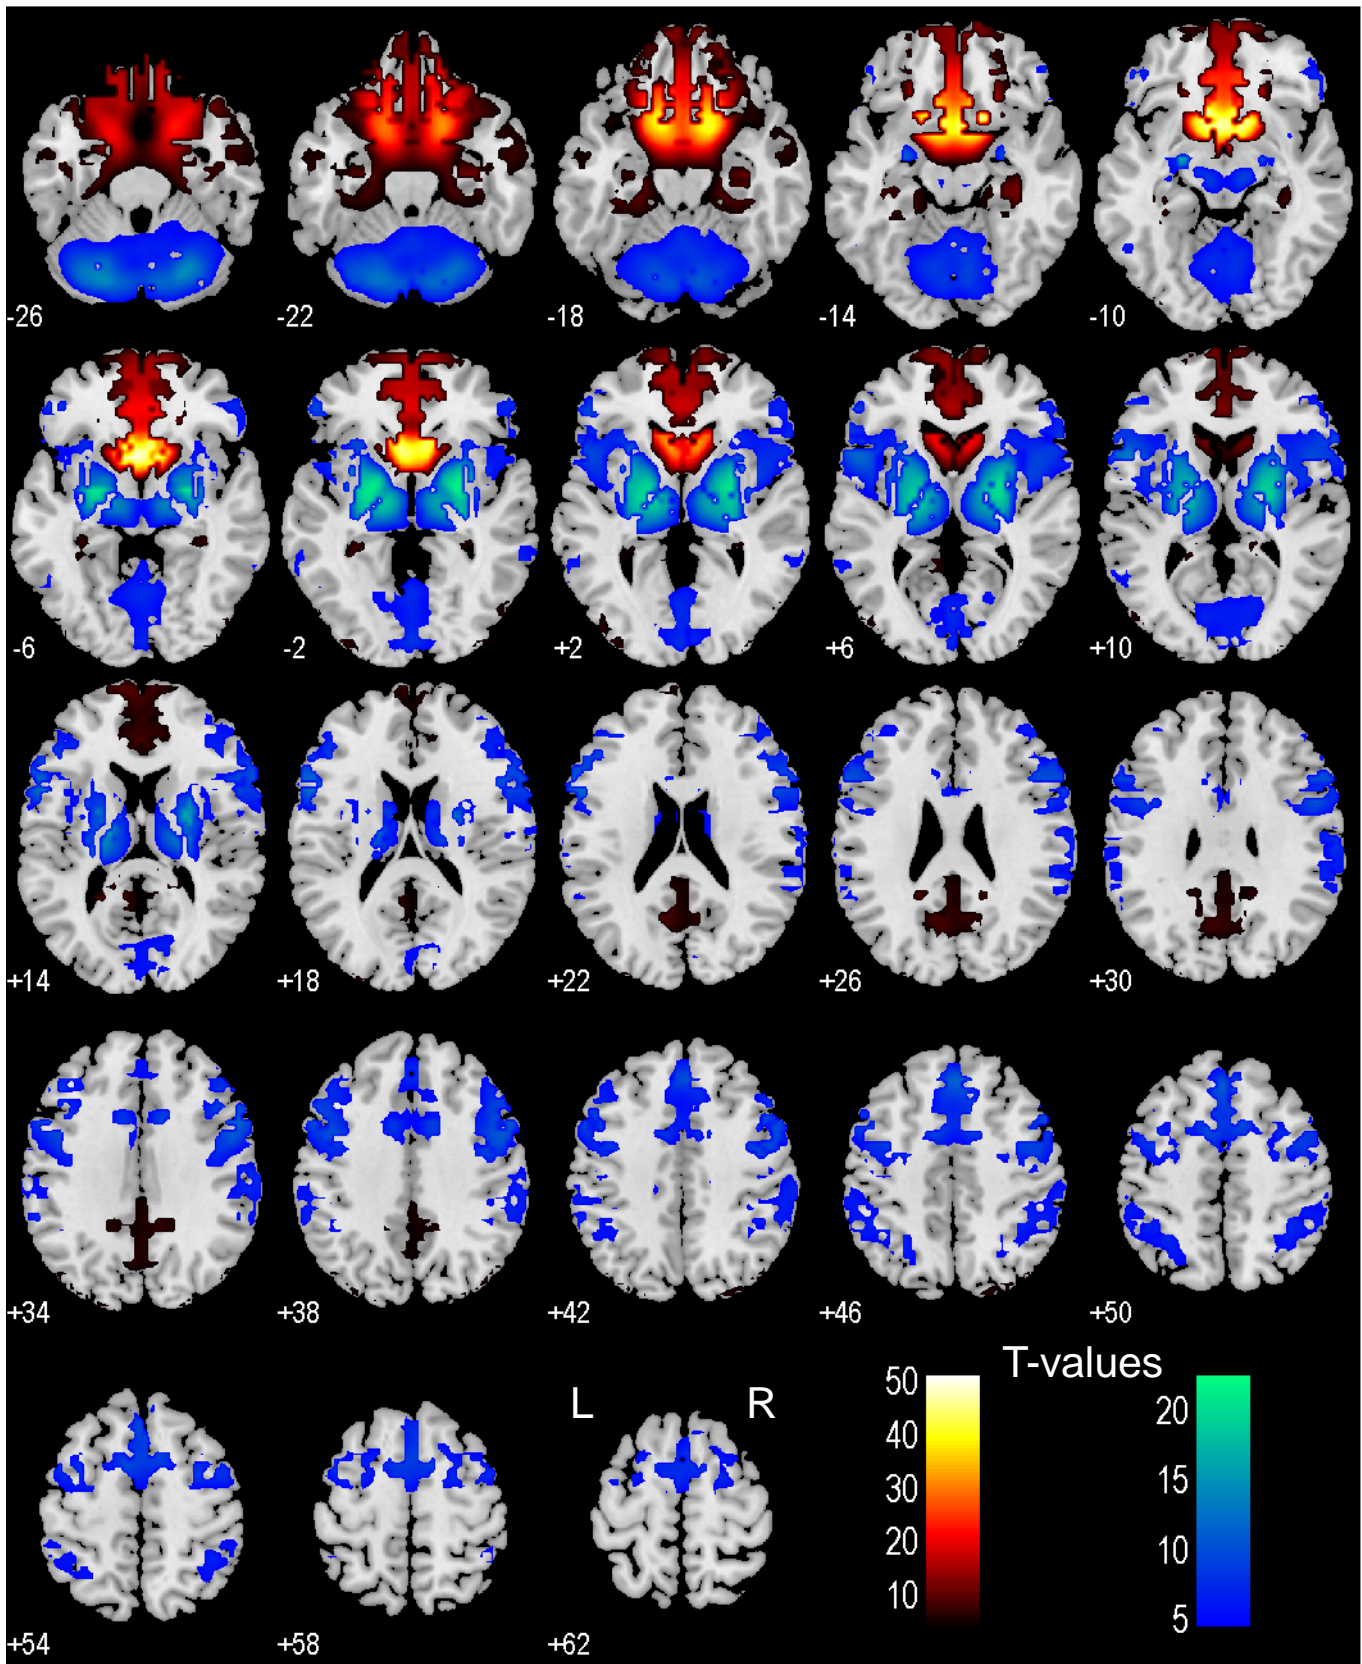

**Supplementary Figure S2: Connectivity of the VS; time series orthogonalized with respect to the BNM.**

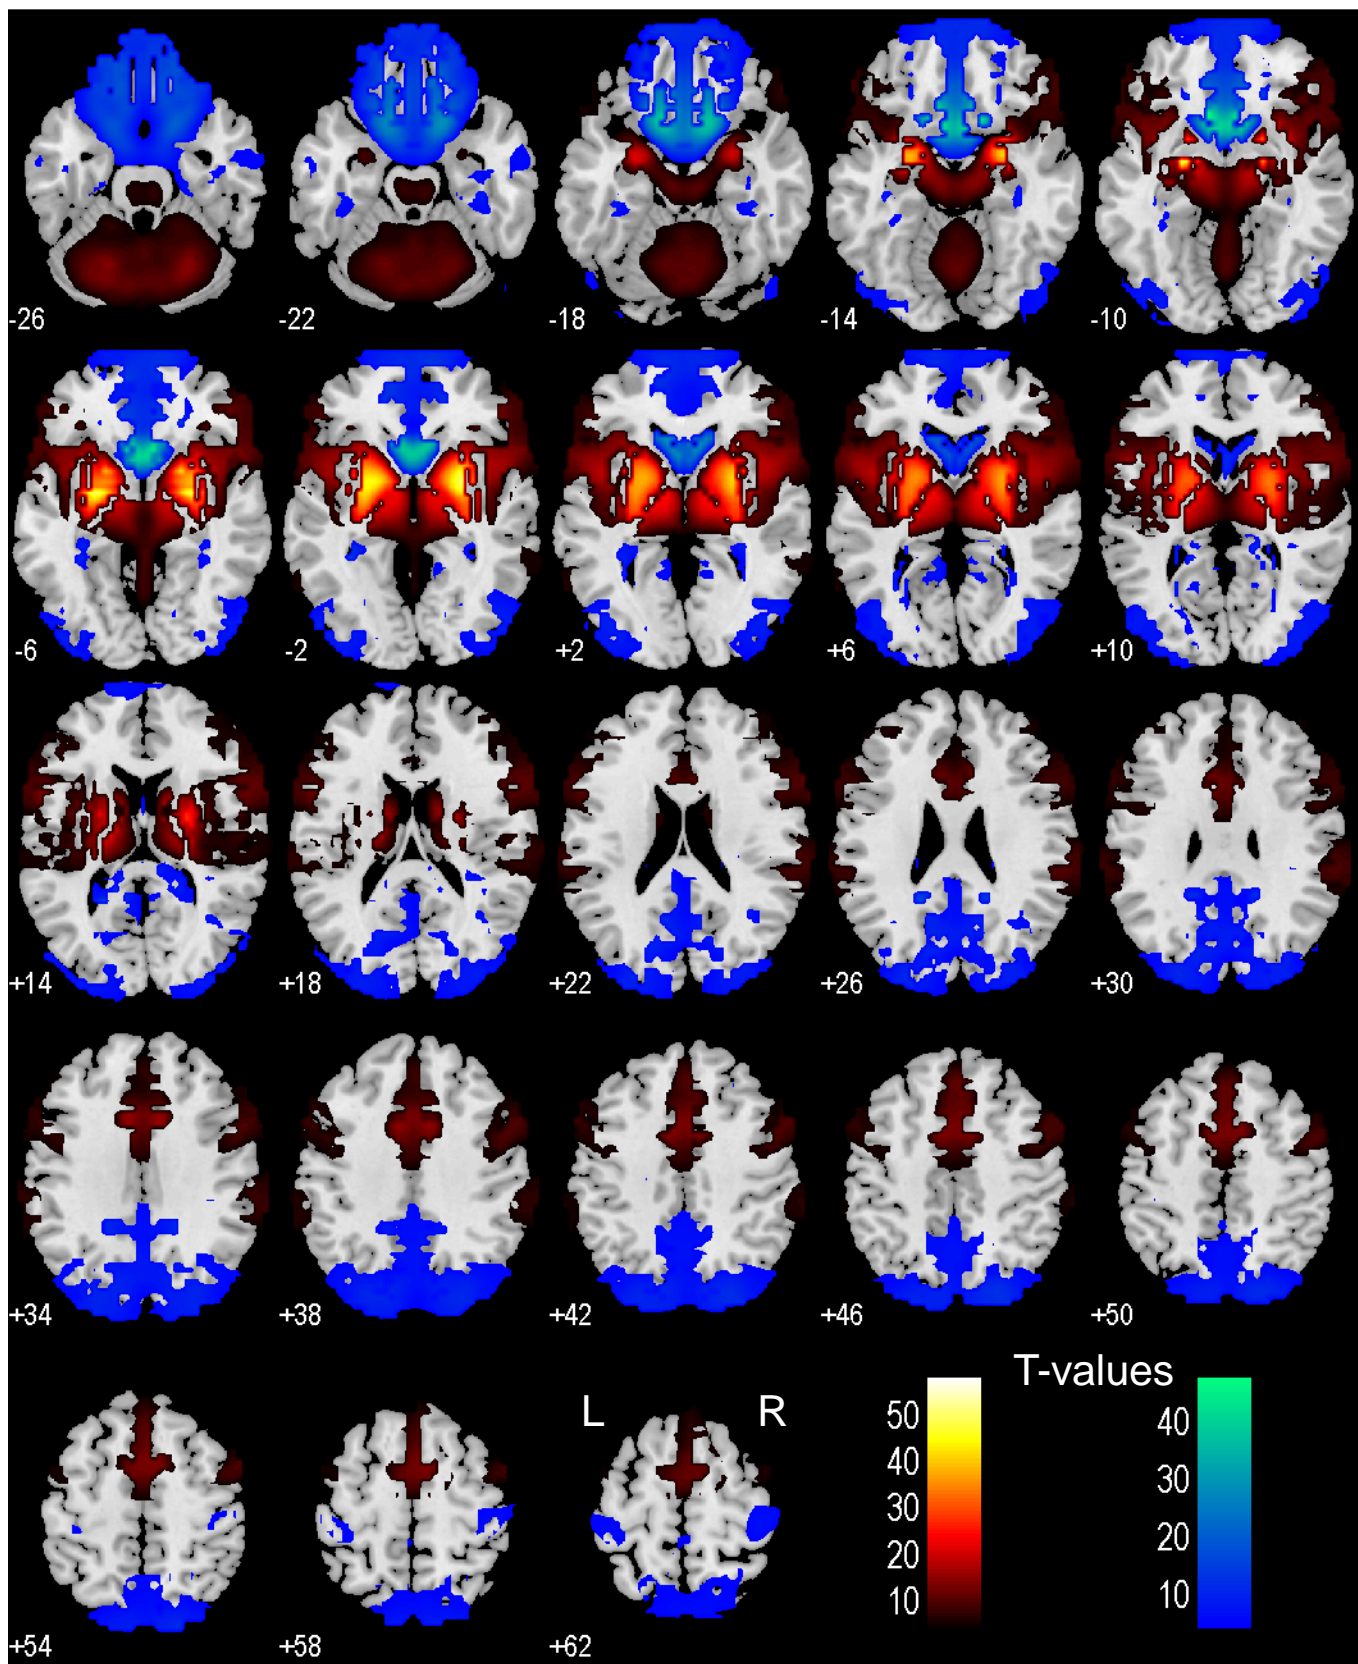

**Supplementary Figure S3: Differences in Connectivity: BNM > VS (warm); VS > BNM (cool); time series orthogonalized.**

**Supplementary Table S1:** Regions showing greater connectivity with basal nucleus of Meynert (BNM) as compared to ventral striatum (VS); paired t-test, n=223. Time series of seed regions were orthogonalized with respect to each other.

| volume<br>(mm <sup>3</sup> ) | peak<br>voxel<br>(Z) | MNI coordinate |     |     | side | identified brain region                  | connectivity |     |
|------------------------------|----------------------|----------------|-----|-----|------|------------------------------------------|--------------|-----|
|                              |                      | x              | y   | z   |      |                                          | BNM          | VS  |
| 446823                       | inf                  | 24             | -1  | -8  | R    | Putamen/Pallidum/Thalamus/Insula/TP/IOFC | +++          | --- |
|                              | inf                  | -21            | -1  | -8  | L    | Putamen/Pallidum/Thalamus/Insula/TP/IOFC | +++          | --- |
|                              | inf                  | 12             | -7  | 1   | R/L  | Amygdala/Midbrain/Parahippocampal G      | +++          | +/- |
|                              | inf                  | 9              | 14  | 37  | R    | ACC/SMA/pre-SMA                          | +            | -   |
|                              | inf                  | -9             | 14  | 37  | L    | ACC/SMA/pre-SMA                          | +            | -   |
|                              | inf                  | -63            | -28 | 25  | L    | Temporo-parietal junction                | +            | -   |
| 1404                         | 6.60                 | -60            | -55 | 1   | L    | Middle temporal G                        | +            | -   |
| 1890                         | 6.05                 | 63             | -46 | 1   | R    | Middle temporal G                        | +            | -   |
| 702                          | 6.04                 | -27            | -10 | -41 | L    | Cerebellum                               | +            | -   |
| 135                          | 5.04                 | 27             | -13 | -41 | R    | Cerebellum                               | +            | -   |

Note: inf: infinity; R: right; L: left; TP: temporal pole; IOFC: lateral orbitofrontal cortex; G: gyrus; ACC: anterior cingulate cortex; SMA: supplementary motor area; DLPFC: dorsolateral prefrontal cortex; +/- indicates positive and negative connectivity (with ++/-- for stronger connectivity), and ~ indicates no significant connectivity at one-sample t test, p<0.05, FWE corrected.

**Supplementary Table S2.** Regions showing greater connectivity with ventral striatum (VS) as compared to the basal nucleus of Meynert (BNM); paired t-test, n=223. Time series of seed regions were orthogonalized with respect to each other.

| volume<br>mm <sup>3</sup> | peak<br>voxel<br>Z | MNI coordinate |     |    | side | identified brain region                                 | connectivity |      |
|---------------------------|--------------------|----------------|-----|----|------|---------------------------------------------------------|--------------|------|
|                           |                    | x              | y   | z  |      |                                                         | BNM          | VS   |
| 401868                    | inf                | 6              | 14  | -5 | R    | ventral Caudate/mOFC/Subcallosal G/Rectus G/Olfactory S | —            | ++/+ |
|                           | inf                | -6             | 14  | -5 | L    | ventral Caudate/mOFC/Subcallosal G/Rectus G/Olfactory S | —            | ++/+ |
|                           | inf                | -18            | -49 | 22 | L    | Posterior Cingulate G/Cuneus/Precuneus                  | --/-         | ~/+  |
|                           | inf                | 18             | -46 | 25 | R    | Posterior Cingulate G/Cuneus/Precuneus                  | --/-         | ~/+  |
| 4104                      | 6.84               | 42             | -28 | 64 | R    | Postcentral G                                           | —            | +/~  |
| 3510                      | 6.07               | -36            | -31 | 64 | L    | Postcentral G                                           | —            | +/~  |

Note: inf: infinity; R: right; L: left; mOFC: medial orbitofrontal cortex; G: gyrus; S: sulcus; pCG: posterior cingulate gyrus; +/- indicates positive and negative connectivity (with +/+/- indicating stronger connectivity), and ~ indicates no significant connectivity at one-sample t test, p<0.05 FWE corrected.
